# Supplementary material
Source: HighWire-hosted journal article supplement (https://jim.bmj.com/content/65/2/311)
Supplement: inline-supplementary-material-1 [file inline-supplementary-material-1.pdf]

Appendix 1: Most frequent causes of cancer mortality among men and women combined age 20 to 44

| Type of Cancer                   | Men and Women Combined Mortality (deaths per 100,000) |
|----------------------------------|-------------------------------------------------------|
| Breast                           | 2.86                                                  |
| Lung and Bronchus                | 2.31                                                  |
| Colon and Rectum                 | 1.67                                                  |
| Colon excluding Rectum           | 1.26                                                  |
| Rectum and Rectosigmoid Junction | 0.4                                                   |
| Brain and Other Nervous System   | 1.4                                                   |
| Leukemia                         | 1.36                                                  |
| Lymphoma                         | 1.18                                                  |
| Melanoma of the Skin             | 0.74                                                  |
| Pancreas                         | 0.6                                                   |
| Stomach                          | 0.6                                                   |
| Liver and Intrahepatic Bile Duct | 0.48                                                  |

Appendix 2: Most frequent causes of cancer mortality among men aged 20 to 44

| Type of Cancer                   | Mortality (deaths per 100,000) |
|----------------------------------|--------------------------------|
| Lung and Bronchus                | 2.42                           |
| Colon and Rectum                 | 1.82                           |
| Colon excluding Rectum           | 1.34                           |
| Rectum and Rectosigmoid Junction | 0.48                           |
| Brain and Other Nervous System   | 1.73                           |
| Leukemia                         | 1.57                           |
| Lymphoma                         | 1.47                           |
| Melanoma of the Skin             | 0.88                           |
| Pancreas                         | 0.72                           |
| Liver and Intrahepatic Bile Duct | 0.65                           |
| Stomach                          | 0.66                           |
| Esophagus                        | 0.52                           |

Appendix 3: Most frequent causes of cancer mortality among women aged 20 to 44

| Type of Cancer                   | Mortality (deaths per 100,000) |
|----------------------------------|--------------------------------|
| Breast                           | 5.66                           |
| Lung and Bronchus                | 2.2                            |
| Cervix and Uteri                 | 1.66                           |
| Colon and Rectum                 | 1.51                           |
| Colon excluding Rectum           | 1.18                           |
| Rectum and Rectosigmoid Junction | 0.32                           |
| Brain and Other Nervous System   | 1.08                           |
| Ovary                            | 1.03                           |
| Leukemia                         | 1.15                           |
| Lymphoma                         | 0.88                           |
| Melanoma of the Skin             | 0.6                            |
| Stomach                          | 0.55                           |

Appendix 4: Incidence of Top 5 Cancers in Men and Women aged 20 to 49

| Age Range                             | 20-24 | 25-29 | 30-34 | 35-39 | 40-44 | 45-49 |
|---------------------------------------|-------|-------|-------|-------|-------|-------|
| Colon and Rectum (cases per 100,000)  | 0.92  | 2.14  | 4.49  | 8.48  | 16.13 | 29.64 |
| Colon only                            | 0.59  | 1.31  | 2.79  | 5.08  | 9.70  | 17.73 |
| Rectum and Rectosigmoid Junction only | 0.33  | 0.83  | 1.71  | 3.40  | 6.42  | 11.91 |
| Lung and Bronchus                     | 0.31  | 0.58  | 1.24  | 3.28  | 9.71  | 24.28 |
| Brain and Other Nervous System        | 2.25  | 2.84  | 3.33  | 3.79  | 4.45  | 5.94  |
| Lymphoma                              | 6.80  | 7.60  | 8.73  | 10.25 | 13.23 | 17.48 |
| Leukemia                              | 2.58  | 2.67  | 3.29  | 4.00  | 5.28  | 7.66  |

Appendix 5: Incidence of Top 5 Cancers in Men aged 20 to 49

| Age Range                             | 20-24 | 25-29 | 30-34 | 35-39 | 40-44 | 45-49 |
|---------------------------------------|-------|-------|-------|-------|-------|-------|
| Colon and Rectum (cases per 100,000)  | 0.93  | 2.19  | 4.62  | 8.93  | 16.8  | 32.23 |
| Colon only                            | 0.61  | 1.31  | 2.81  | 5.18  | 9.75  | 18.45 |
| Rectum and Rectosigmoid Junction only | 0.32  | 0.88  | 1.80  | 3.74  | 7.05  | 13.78 |
| Lung and Bronchus                     | 0.31  | 0.56  | 1.20  | 3.15  | 9.54  | 24.86 |
| Brain and Other Nervous System        | 2.35  | 3.15  | 3.83  | 4.41  | 5.29  | 7.09  |
| Lymphoma                              | 7.14  | 8.09  | 9.73  | 12.12 | 16.27 | 21.11 |
| Leukemia                              | 2.97  | 3.08  | 3.65  | 4.55  | 6.06  | 9.02  |

Appendix 6: Incidence of Top 5 Cancers in Women aged 20 to 49

| Age Range                             | 20-24 | 25-29 | 30-34 | 35-39 | 40-44  | 45-49  |
|---------------------------------------|-------|-------|-------|-------|--------|--------|
| Colon and Rectum (cases per 100,000)  | 0.92  | 2.09  | 4.36  | 8.03  | 15.46  | 27.11  |
| Colon only                            | 0.58  | 1.32  | 2.76  | 4.97  | 9.66   | 17.03  |
| Rectum and Rectosigmoid Junction only | 0.34  | 0.77  | 1.61  | 3.06  | 5.81   | 10.08  |
| Lung and Bronchus                     | 0.31  | 0.61  | 1.28  | 3.40  | 9.87   | 23.70  |
| Breast                                | 1.48  | 8.52  | 26.68 | 60.33 | 121.20 | 188.63 |
| Cervix Uteri                          | 1.42  | 5.45  | 10.81 | 13.81 | 15.33  | 14.24  |
| Lymphoma                              | 7.14  | 8.09  | 9.73  | 12.12 | 10.21  | 13.93  |
